# Supplementary material
Source: publisher figshare collection journal article supplement (https://frontiersin.figshare.com/ndownloader/files/17503367)
Supplement: Supplementary file [file 17503367]

# **Identification of Benzyloxy Carbonimidoyl Dicyanide Derivatives as Novel Type III Secretion System Inhibitors via High-Throughput Screening**

**Yi-Nan Ma<sup>1†</sup>, Liang Chen<sup>1, 2†</sup>, Nai-Guo Si<sup>2</sup>, Wen-Jun Jiang<sup>1</sup>, Zhi-Gang Zhou<sup>3</sup>, Jun-Li Liu<sup>2</sup>, Li-Qun Zhang<sup>1\*</sup>**

<sup>1</sup>Department of Plant Pathology and MOA Key Laboratory of Pest Monitoring and Green Management, China Agricultural University, Beijing, China;

<sup>2</sup>State Key Laboratory of the Discovery and Development of Novel Pesticide, Shenyang Sinochem Agrochemicals R&D Co., Ltd, Shenyang, China.

<sup>3</sup>China-Norway Joint Lab on Fish Gut Microbiota, Feed Research Institute, Chinese Academy of Agricultural Sciences, Beijing 100081, PR China.

**\*Corresponding author:**

Li-Qun Zhang,

[zhanglq@cau.edu.cn](mailto:zhanglq@cau.edu.cn)

**†These authors have contributed equally to this work**

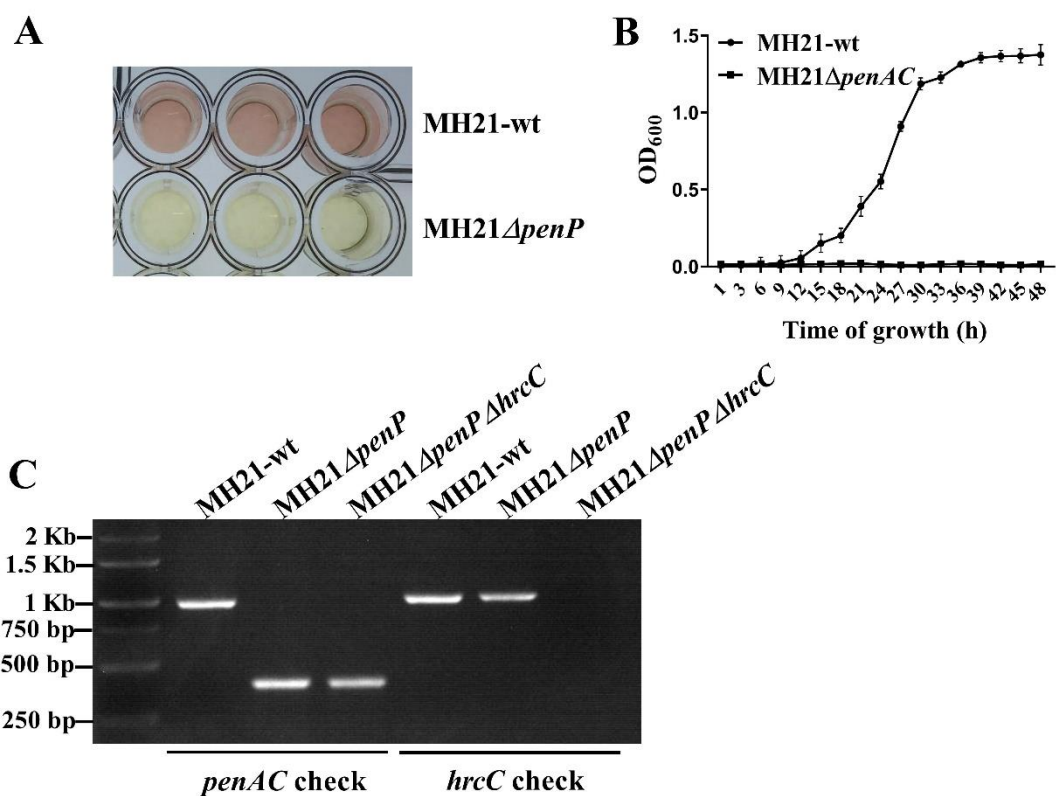

Figure S1. Mutant construction and functional analysis of the *penAC* gene in *Acidovorax citrulli* MH21. (A) Bacterial suspension of MH21 wild-type and mutant  $\Delta$ *penAC*. Photographs were taken 15 min after supplementation of nitrocefin (20  $\mu$ g/mL). (B) Growth curves of MH21 wild-type and mutant  $\Delta$ *penAC* in LB medium supplemented with 50  $\mu$ g/mL ampicillin (Ap). (C) MH21 wild-type, mutant  $\Delta$ *penAC* and double mutant  $\Delta$ *penAC* $\Delta$ *hrcC* were confirmed by PCR amplification using *penAC*-dF/-dR or *hrcC*-dF/-dR primers, respectively.
